# Supplementary material for: Influenza A Virus Migration and Persistence in North American Wild Birds
Source: PLOS journal article supplement (doi:10.1371/journal.ppat.1003570), 2013-08-29

**A****Mean migration rate per MCMC state**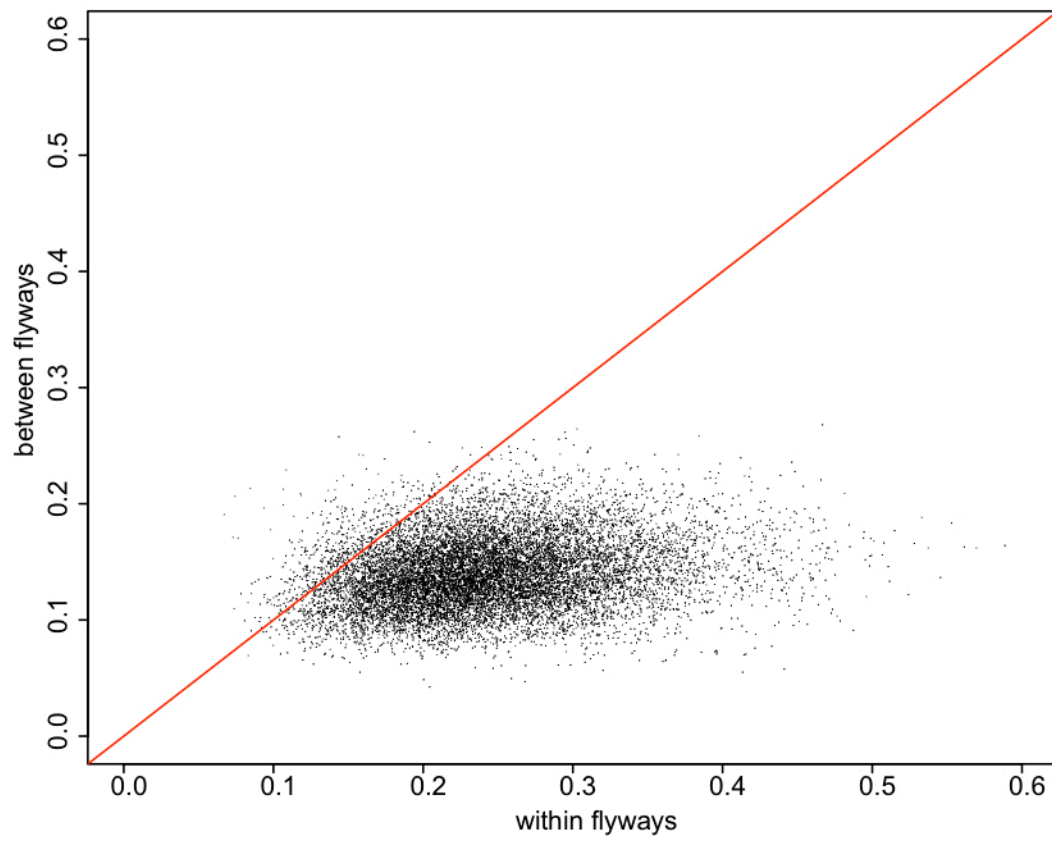**B****Mean within vs. between migration rate densities**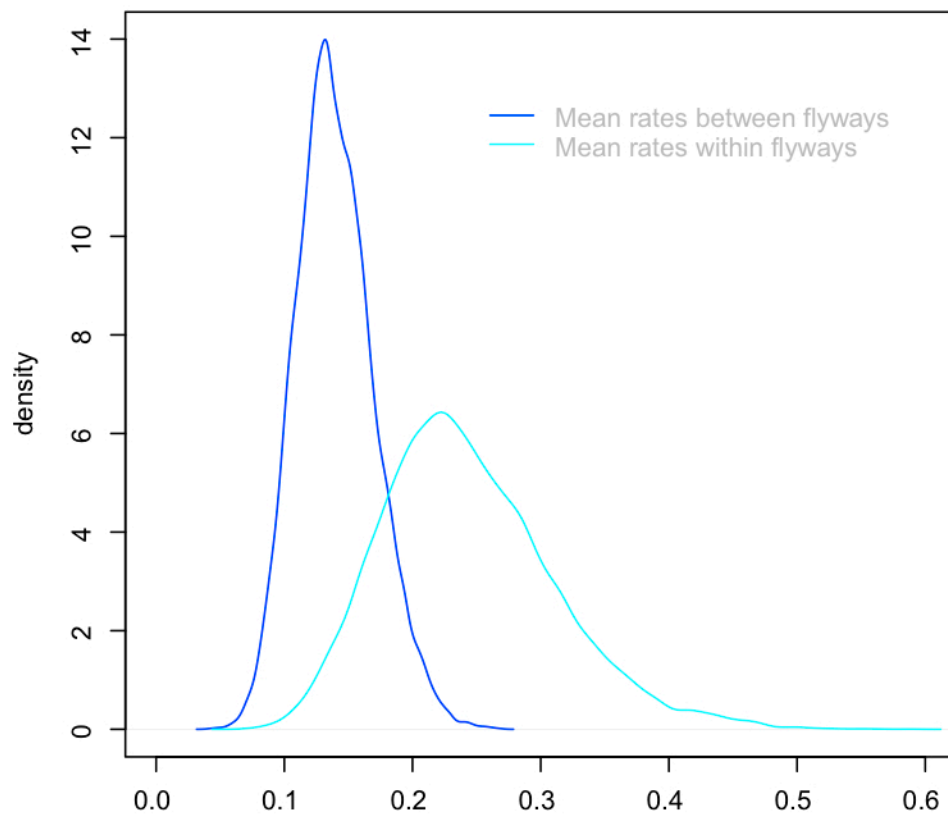

Supplement: S9 (10.1371/journal.ppat.1003570.s009) [file journal.ppat.1003570.s009]
